# Supplementary material for: Two new canted antiferromagnetic systems: magnetic, theoretical, and crystallographic studies on trans-bis(2-iodopyridine)dihalocopper(ii)
Source: Royal Society of Chemistry journal article supplement (doi:10.1039/d0dt04071a), 2021-01-01
Supplement: d0dt04071a1.pdf [file d0dt04071a1.pdf]

Table S1. Summary of data collection and refinement parameters for reported crystal structures.

| Crystal                                        | <sup>c</sup> Cu(2ip) <sub>2</sub> Cl <sub>2</sub>                              | <sup>c</sup> Cu(2ip) <sub>2</sub> Cl <sub>2</sub>                              | <sup>d</sup> Cu(2ip) <sub>2</sub> Br <sub>2</sub>                              | <sup>d</sup> Cu(2ip) <sub>2</sub> Br <sub>2</sub>                              | Cu(2ip) <sub>2</sub> Cl <sub>2</sub>                                           | Cu(2ip) <sub>2</sub> Br <sub>2</sub>                                           |
|------------------------------------------------|--------------------------------------------------------------------------------|--------------------------------------------------------------------------------|--------------------------------------------------------------------------------|--------------------------------------------------------------------------------|--------------------------------------------------------------------------------|--------------------------------------------------------------------------------|
| Formula                                        | C <sub>10</sub> H <sub>8</sub> Cl <sub>2</sub> CuI <sub>2</sub> N <sub>2</sub> | C <sub>10</sub> H <sub>8</sub> Cl <sub>2</sub> CuI <sub>2</sub> N <sub>2</sub> | C <sub>10</sub> H <sub>8</sub> Br <sub>2</sub> CuI <sub>2</sub> N <sub>2</sub> | C <sub>10</sub> H <sub>8</sub> Br <sub>2</sub> CuI <sub>2</sub> N <sub>2</sub> | C <sub>10</sub> H <sub>8</sub> Cl <sub>2</sub> CuI <sub>2</sub> N <sub>2</sub> | C <sub>10</sub> H <sub>8</sub> Br <sub>2</sub> CuI <sub>2</sub> N <sub>2</sub> |
| M <sub>r</sub>                                 | 544.42                                                                         | 544.42                                                                         | 633.34                                                                         | 633.34                                                                         | 544.42                                                                         | 633.34                                                                         |
| ρ <sub>calc</sub> (Mg/m <sup>3</sup> )         | 2.509                                                                          | 2.539                                                                          | 2.774                                                                          | 2.822                                                                          | 2.500                                                                          | 2.760                                                                          |
| Crystal system                                 | Monoclinic                                                                     | Monoclinic                                                                     | Monoclinic                                                                     | Monoclinic                                                                     | Monoclinic                                                                     | Monoclinic                                                                     |
| Space group                                    | C2/c                                                                           | C2/c                                                                           | C2/c                                                                           | C2/c                                                                           | C2/c                                                                           | C2/c                                                                           |
| a (Å)                                          | 15.4157(9)                                                                     | 15.3782(17)                                                                    | 15.5405(17)                                                                    | 15.4484(14)                                                                    | 15.439(1)                                                                      | 15.561(1)                                                                      |
| b (Å)                                          | 7.7608(4)                                                                      | 7.7571(9)                                                                      | 7.9511(9)                                                                      | 7.9306(7)                                                                      | 7.771(1)                                                                       | 7.963(1)                                                                       |
| c (Å)                                          | 12.7242(6)                                                                     | 12.6701(14)                                                                    | 12.9193(14)                                                                    | 12.8457(11)                                                                    | 12.731(1)                                                                      | 12.949(1)                                                                      |
| β (°)                                          | 108.754(3)                                                                     | 109.536(5)                                                                     | 108.214(4)                                                                     | 108.690(3)                                                                     | 108.73(1)                                                                      | 108.16(1)                                                                      |
| V (Å <sup>3</sup> )                            | 1441.48(13)                                                                    | 1424.4(3)                                                                      | 1516.4(3)                                                                      | 1490.8(2)                                                                      | 1446.44(7)                                                                     | 1524.46(15)                                                                    |
| Temperature (K)                                | 296(2)                                                                         | 150(2)                                                                         | 296(2)                                                                         | 150(2)                                                                         | 298                                                                            | 298                                                                            |
| CCDC                                           | 2063248                                                                        | 2063249                                                                        | 2063250                                                                        | 2063251                                                                        | 2036457                                                                        | 2036456                                                                        |
| ind. Reflections                               | 1747                                                                           | 1724                                                                           | 1681                                                                           | 1671                                                                           | 1473                                                                           | 1538                                                                           |
| Data/restraints/ paraf                         | 1747/0/80                                                                      | 1724/0/80                                                                      | 1681/0/80                                                                      | 1671/0/80                                                                      | 1473 / 0 / 80                                                                  | 1538 / 0 / 79                                                                  |
| R(int)                                         | 0.0128                                                                         | 0.0213                                                                         | 0.0676                                                                         | 0.0532                                                                         | 0.0218                                                                         | 0.0223                                                                         |
| Z                                              | 4                                                                              | 4                                                                              | 4                                                                              | 4                                                                              | 4                                                                              | 4                                                                              |
| Goodness of fit                                | 1.097                                                                          | 1.162                                                                          | 1.024                                                                          | 1.071                                                                          | 1.033                                                                          | 1.036                                                                          |
| R <sub>1</sub> <sup>a</sup> [I > 2σ]           | 0.0164                                                                         | 0.0117                                                                         | 0.0353                                                                         | 0.0303                                                                         | 0.0237                                                                         | 0.0320                                                                         |
| wR <sub>2</sub> <sup>b</sup> [I > 2σ]          | 0.0363                                                                         | 0.0259                                                                         | 0.0652                                                                         | 0.0614                                                                         | 0.0474                                                                         | 0.0706                                                                         |
| μ,<br>mm <sup>-1</sup>                         | 6.148                                                                          | 6.222                                                                          | 10.762                                                                         | 10.947                                                                         | 6.127                                                                          | 10.705                                                                         |
| Largest diff.<br>peak/hole / e Å <sup>-3</sup> | 0.47/-0.52                                                                     | 0.39/-0.33                                                                     | 0.78/-0.84                                                                     | 0.95/-1.49                                                                     | 0.505 and -0.36                                                                | 0.559 and -0.944                                                               |

$$^a R_1 = \frac{\sum ||F_o| - |Fc||}{\sum |F_o|}$$

$$^b wR_2 = \left\{ \frac{\sum w(F_o^2 - F_c^2)^2}{\sum w(F_o^2)^2} \right\}^{1/2}$$

<sup>c</sup>data set were collected using the same crystal.

<sup>d</sup>data set were collected using the same crystal.

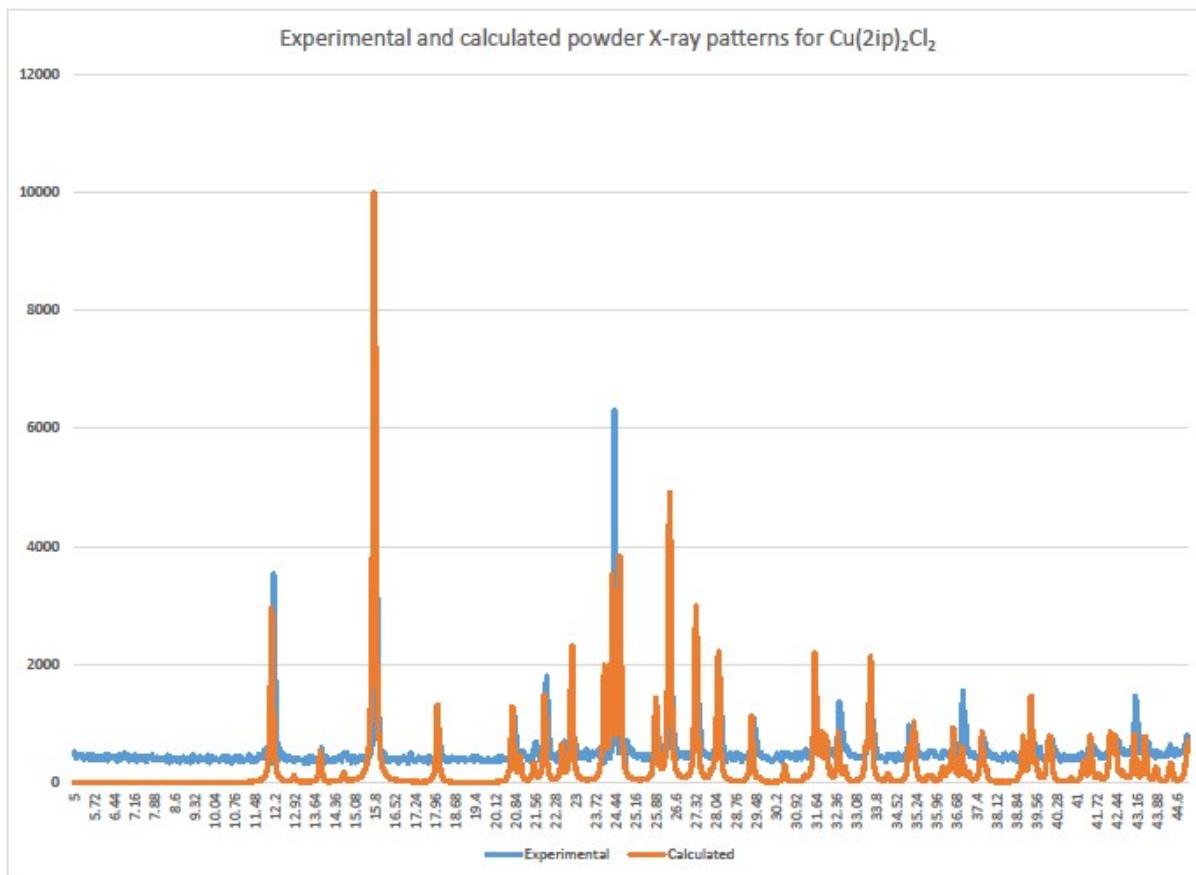

**Figure S1.** XRD diffraction pattern (Blue) of  $\text{Cu}(\text{zip})_2\text{Cl}_2$  and the calculated one (Brown).

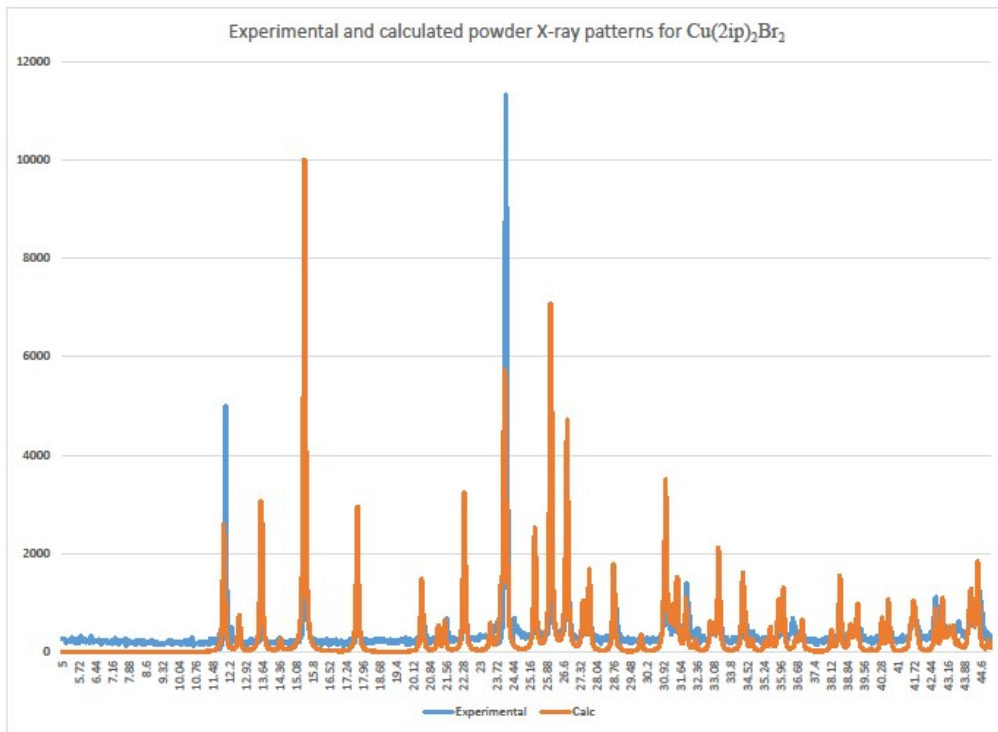

**Figure S2.** XRD diffraction pattern (Blue) of  $\text{Cu}(\text{2ip})_2\text{Br}_2$  and the calculated one (Brown).
